# Supplementary material
Source: PubMed Central journal article supplement (PMC3737770)
Supplement: NIHMS72364-supplement-Supplementary_Data.pdf [file NIHMS72364-supplement-Supplementary_Data.pdf]

**TABLE E1.** Early exposure to dust mite allergen and asthma, rhinitis, and atopy

| Allergen levels                                 | Asthma |     |                |                | Allergic rhinitis |     |               |               | Atopy (sensitization to $\geq 1$ allergen) |    |               |               |
|-------------------------------------------------|--------|-----|----------------|----------------|-------------------|-----|---------------|---------------|--------------------------------------------|----|---------------|---------------|
|                                                 | Yes    | No  | Unadjusted     | Adjusted†      | Yes               | No  | OR (95% CI)   |               | Yes                                        | No | Unadjusted    | Adjusted§     |
|                                                 |        |     |                |                |                   |     | Unadjusted    | Adjusted‡     |                                            |    |               |               |
| Der p or Der f, child's bed ( $\mu\text{g/g}$ ) |        |     |                |                |                   |     |               |               |                                            |    |               |               |
| <0.05                                           | 14     | 184 | 1.0            | 1.0            | 24                | 174 | 1.0           | 1.0           | 67                                         | 56 | 1.0           | 1.0           |
| $\geq 0.05$ to <0.69                            | 11     | 69  | 2.1 (0.9-4.9)  | 1.3 (0.5-3.3)  | 12                | 68  | 1.3 (0.6-2.7) | 1.7 (0.7-3.7) | 26                                         | 22 | 1.0 (0.5-1.9) | 0.9 (0.5-1.9) |
| $\geq 0.69$ to <2.73                            | 5      | 76  | 0.9 (0.3-2.5)  | 0.9 (0.3-2.7)  | 14                | 67  | 1.5 (0.7-3.1) | 1.5 (0.7-3.2) | 23                                         | 23 | 0.8 (0.4-1.6) | 0.9 (0.5-1.9) |
| $\geq 2.73$                                     | 13     | 67  | 2.6 (1.1-5.7)* | 2.8 (1.2-6.5)* | 14                | 66  | 1.5 (0.3-2.8) | 1.9 (0.9-4.3) | 32                                         | 20 | 1.3 (0.7-2.6) | 1.3 (0.7-2.6) |

\* $P < .05$ .

†Adjusted for sex, household income, maternal asthma, living in a single-family home, and bottle-feeding before bedtime or sleep in the first year of life.

‡Adjusted for maternal hay fever, living in a single detached home, low birth weight, number of older siblings, and quartiles of endotoxin exposure at age 2 to 3 months.

§Adjusted for sex and household income.

||Nondetectable (reference category) vs tertiles of detectable levels.

**TABLE E2.** Early exposure to dust mite allergen and transient, persistent, and late-onset wheeze

| Allergen levels‡                   | Wheeze            |           |               |               |             |                |               |            |                |                 |
|------------------------------------|-------------------|-----------|---------------|---------------|-------------|----------------|---------------|------------|----------------|-----------------|
|                                    | Never (reference) | Transient | Unadjusted    | Adjusted†     | OR (95% CI) |                |               | Late-onset | Unadjusted     | Adjusted†       |
|                                    |                   |           |               |               | Persistent  | Unadjusted     | Adjusted†     |            |                |                 |
| Der p or Der f, child's bed (µg/g) |                   |           |               |               |             |                |               |            |                |                 |
| <0.05                              | 76                | 70        | 1.0           | 1.0           | 28          | 1.0            |               | 10         | 1.0            | 1.0             |
| ≥0.05                              | 21                | 29        | 1.5 (0.8-2.9) | 1.5 (0.8-3.0) | 17          | 2.2 (1.0-4.8)* | 2.0 (0.9-4.6) | 4          | 1.4(0.4-5.1)   | 1.0 (0.2-4.1)   |
| to <0.69                           |                   |           |               |               |             |                |               |            |                |                 |
| ≥0.69                              | 31                | 37        | 1.3 (0.7-2.3) | 1.2 (0.7-2.3) | 3           | 0.3 (0.1-0.9)* | 0.3 (0.1-1.1) | 7          | 1.7 (0.6-4.9)  | 1.9 (0.7-5.7)   |
| to <2.73                           |                   |           |               |               |             |                |               |            |                |                 |
| ≥2.73                              | 23                | 21        | 1.0 (0.5-1.9) | 0.9 (0.5-1.9) | 16          | 1.9 (0.9-4.1)  | 2.1 (0.9-4.5) | 11         | 3.6 (1.4-9.6)* | 3.9 (1.4-10.7)* |

\**P* < .05.

†Adjusted for sex and household income.

‡Nondetectable (reference category) vs tertiles of detectable levels.
